# Supplementary material for: Evolutionary changes in an invasive plant support the defensive role of plant volatiles
Source: PubMed Central journal article supplement — Curr Biol. 2021 Aug 9;31(15):3450–3456.e5. doi: 10.1016/j.cub.2021.05.055 (PMC8360764; doi:10.1016/j.cub.2021.05.055), 2021-08-09
Supplement: mmc1.pdf [file mmc1.pdf]

**Current Biology, Volume 31**

## **Supplemental Information**

### **Evolutionary changes in an invasive plant support the defensive role of plant volatiles**

**Tiantian Lin, Klaas Vrieling, Diane Laplanche, Peter G.L. Klinkhamer, Yonggen Lou, Leon Bekooy, Thomas Degen, Carlos Bustos-Segura, Ted C.J. Turlings, and Gaylord A. Desurmont**

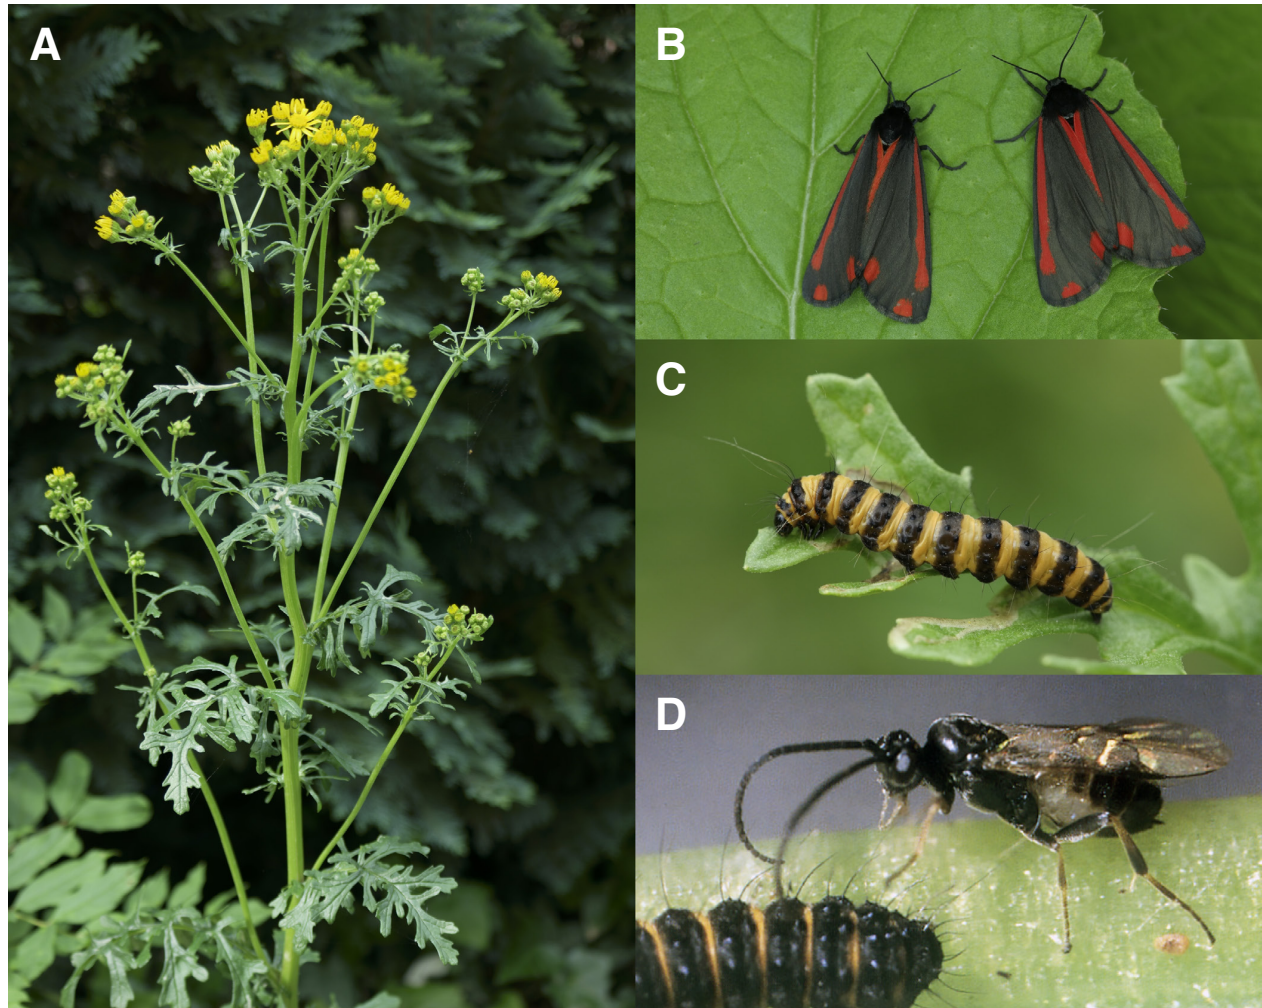

**Figure S1. The tritrophic study system. Related to Figure 1-4.** (A) *Jacobaea vulgaris* is the host plant of (B), (C) the specialist herbivore *Tyria jacobaeae*, which is parasitized by (D), the specialist parasitoid wasp *Cotesia popularis*. Pictures from Thomas Degen (A-C) and Eddy van der Meijden (D).

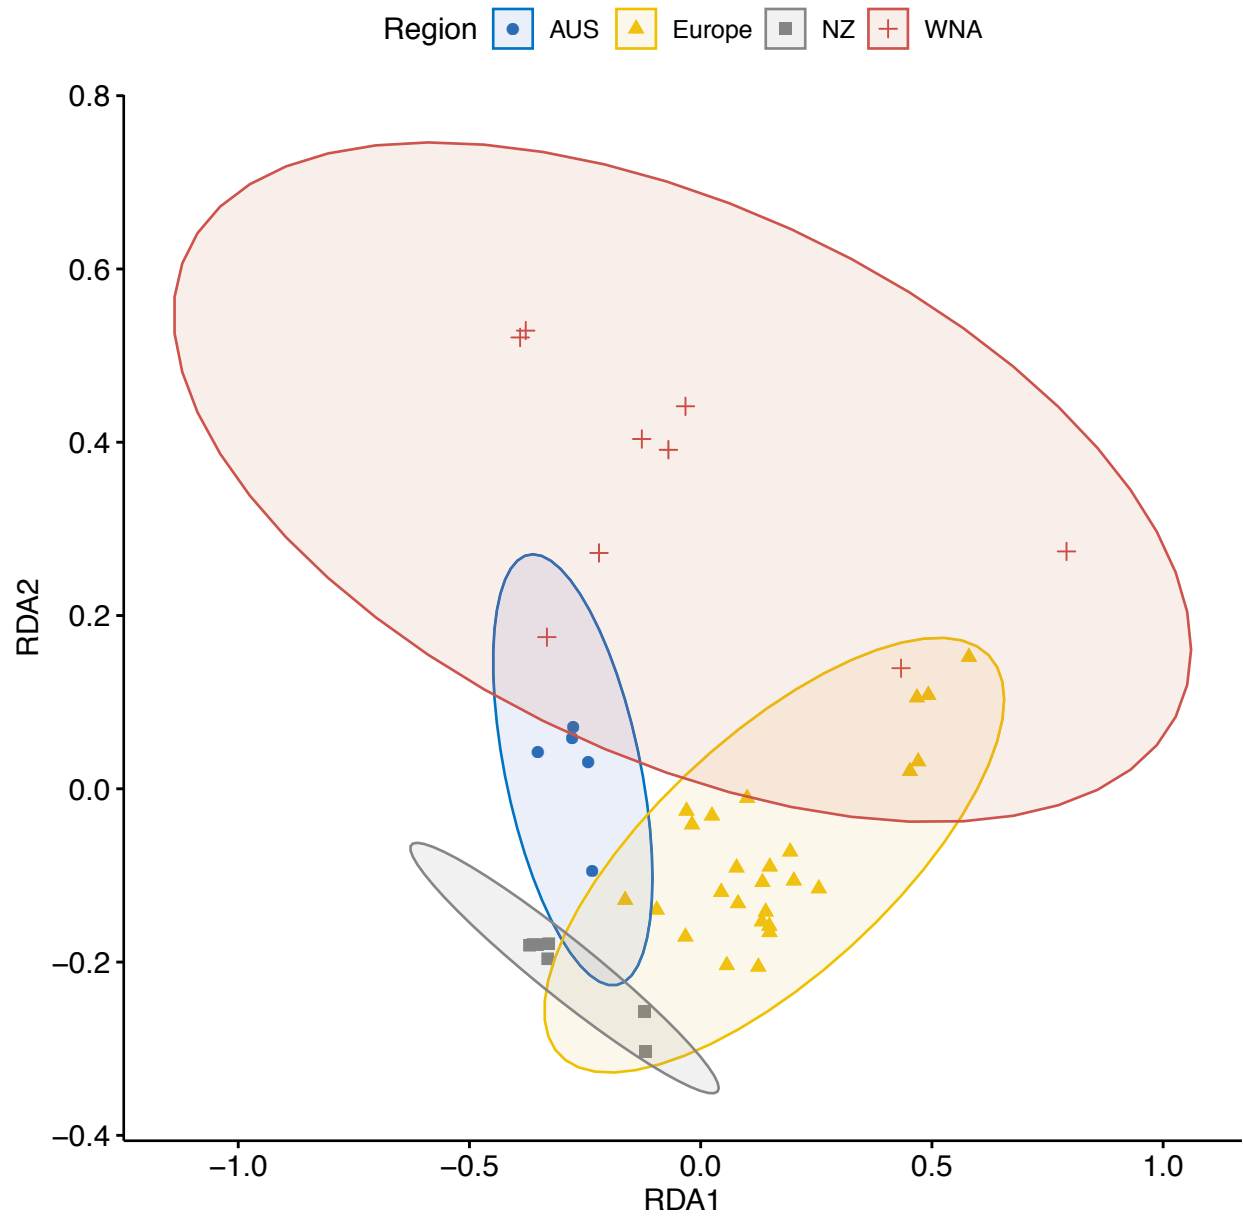

**Figure S2. Redundancy discriminant analyses (RDA) of 19 bioclimatic variables from each of the sampled *J. vulgaris* populations. Related to STAR Methods and Table S2.  $n = 5$  for Australia,  $n = 8$  for New Zealand,  $n = 10$  for Western North America and  $n = 26$  for Europe). Analysis of Deviance(type 2), Range:  $\chi^2_{(3)} = 34.481$ ,  $P < 0.001$ .**

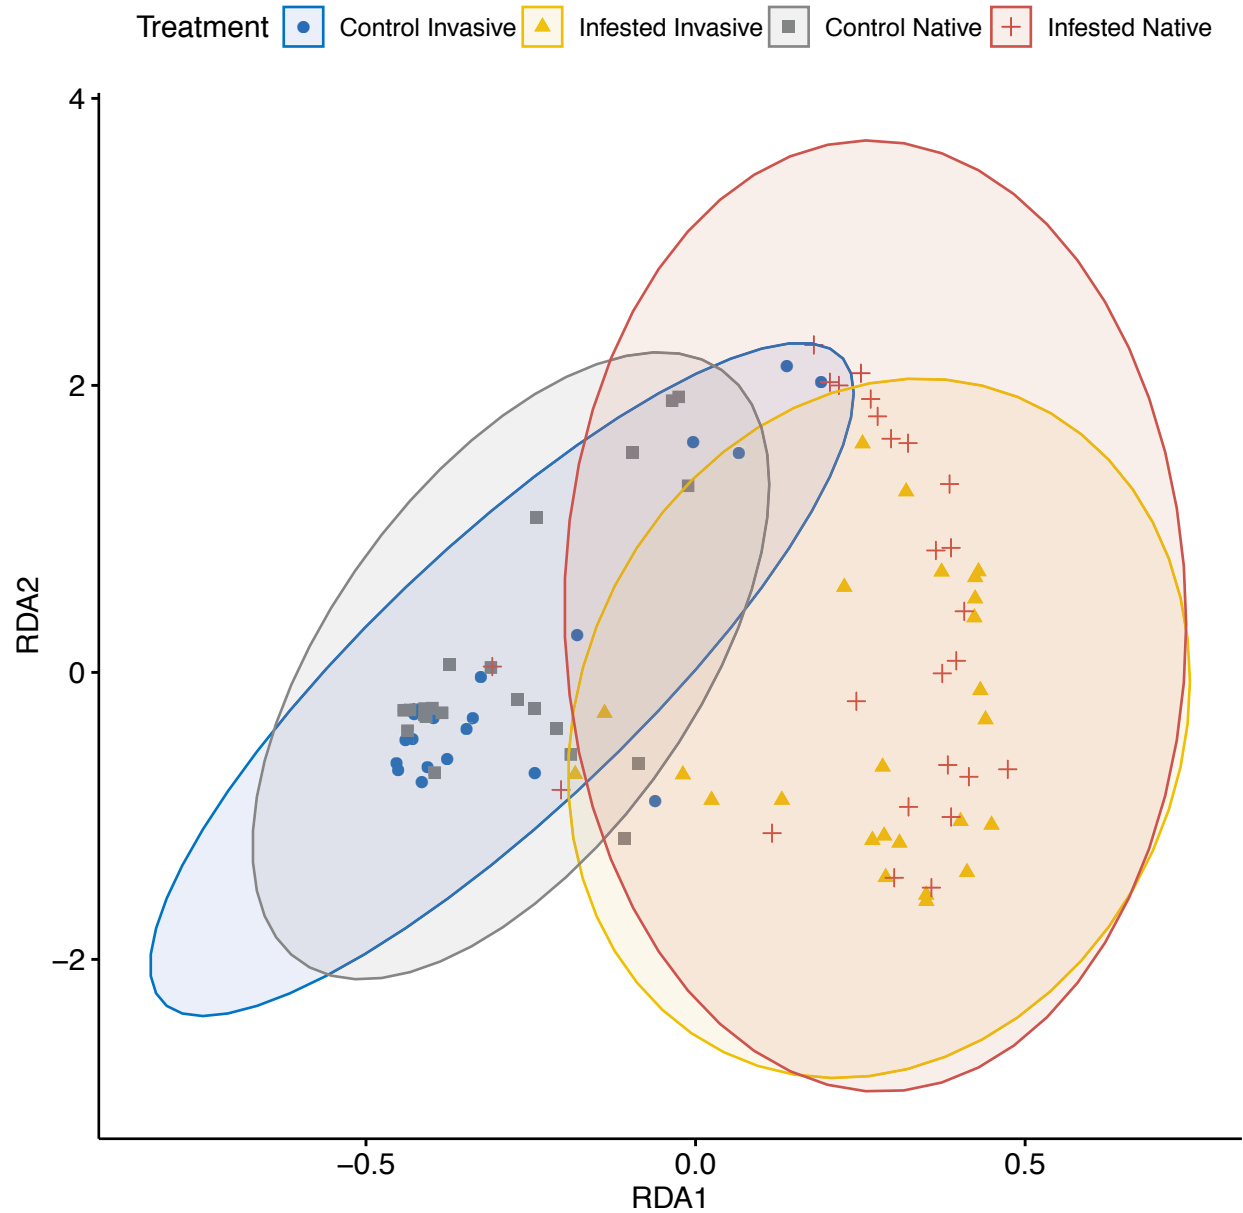

**Figure S3 . Redundancy discriminant analyses (RDA) of total leaf volatile emissions (ng/24h) of native and invasive *J. vulgaris* genotypes before and after infestation with 15 first instar *T. jacobaeae* larvae for 24 hours. Related to Figure 4.** Different treatments were marked with different symbols and colors. Control Native = native *J. vulgaris* genotypes before infestation, Infested Native = native *J. vulgaris* genotypes after infestation, Control Invasive = invasive *J. vulgaris* genotypes before infestation, Infested Invasive = *invasive J. vulgaris* genotypes after infestation. Analysis of Deviance(type 2), Timing:  $\chi^2_{(1)} = 239.343$ ,  $P < 0.001$ ; origin:  $\chi^2_{(1)} = 0.011$ ,  $P = 0.92$ ; timing x origin:  $\chi^2_{(1)} = 0.071$ ,  $P = 0.79$ .

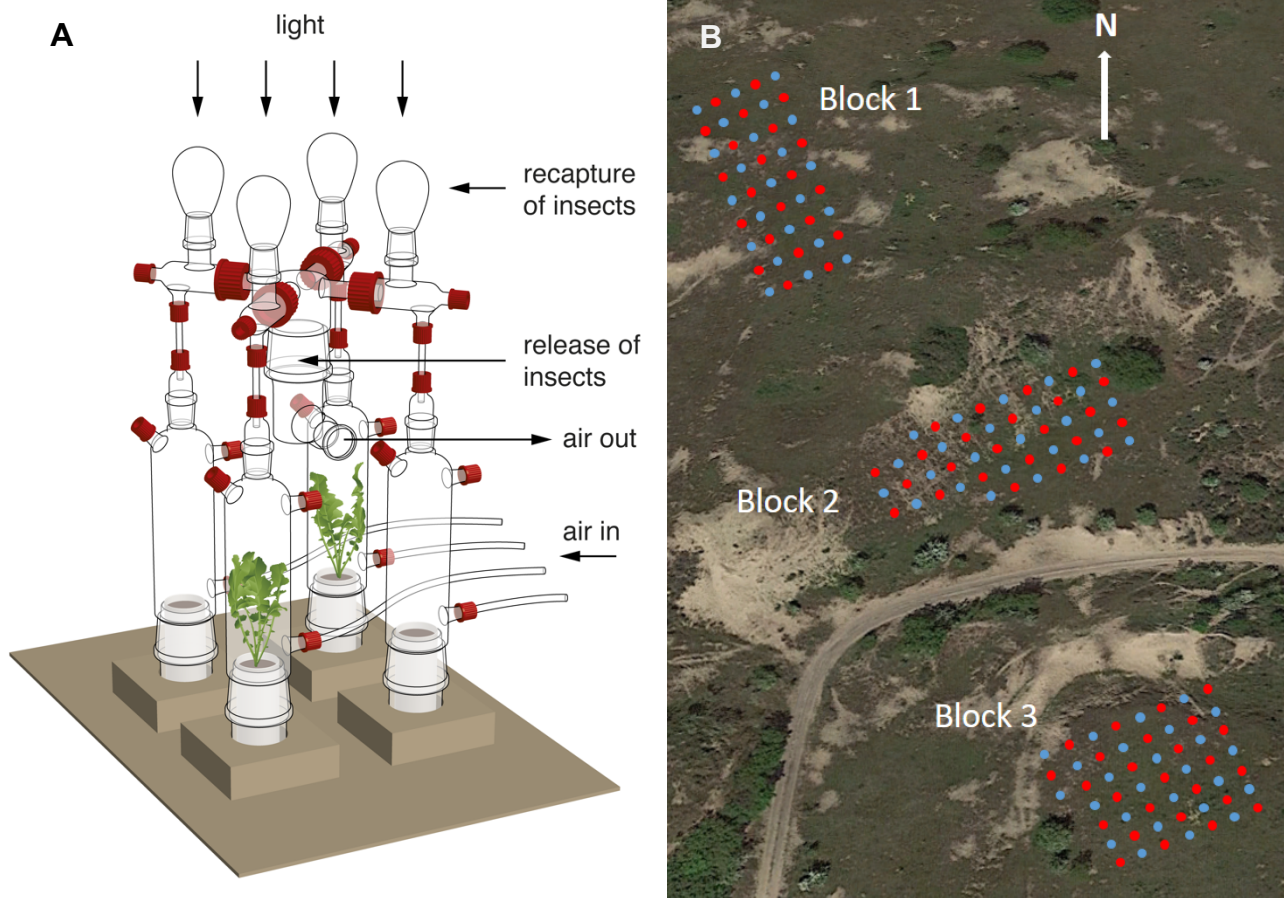

**Figure S4. Four-arm olfactometer and layout of the field experiment. Related to Figure 1, 4 and STAR Methods.** (A) Depiction of the four-arm olfactometer used to assess attraction of the study insects to plant volatiles. (B) Situation of the field experiment conducted in the dunes of Meijendel (near The Hague) in The Netherlands. Pairs of native and invasive *J. vulgaris* plants were placed in three blocks. Blue dots represent a pair of native plants that are 15 cm apart from each other, red dots represent a pair of invasive plants that are 15 cm apart from each other. The distance between pairs of plants was 5 m.

|                                      | Block 1    |                   | Block 2     |                     |             | Block 3     |             | Total              |                     | Grand Total |
|--------------------------------------|------------|-------------------|-------------|---------------------|-------------|-------------|-------------|--------------------|---------------------|-------------|
|                                      | native     | invasive          | native      | invasive            | native      | invasive    | native      | invasive           |                     |             |
| <b>Number of plant pairs</b>         |            |                   |             |                     |             |             |             |                    |                     |             |
| total                                | 23         | 22                | 25          | 24                  | 26          | 26          | 74          | 72                 | 146                 |             |
| with larvae retrieved                | 13         | 17 (18)*          | 21          | 22 (23)*            | 19          | 21          | 53          | 60 (62)*           | 113 (115)*          |             |
| with larvae not parasitized          | 11         | 13 (14)*          | 14          | 11 (11)*            | 11          | 11          | 36          | 35 (36)*           | 71 (72)*            |             |
| with larvae parasitized              | 1          | 4 (4)*            | 7           | 11 (12)*            | 8           | 7           | 16          | 22 (23)*           | 38 (39)*            |             |
| where all larvae died during rearing | 1          | 0 (0)*            | 0           | 0 (0)*              | 0           | 3           | 1           | 3 (3)*             | 4 (4)*              |             |
| <b>Number of larvae</b>              |            |                   |             |                     |             |             |             |                    |                     |             |
| 1st instar placed on pairs           | 920        | 880               | 1000        | 960                 | 1040        | 1040        | 2960        | 2880               | 5840                |             |
| that stayed in the tube              | 15         | 13                | 28          | 23                  | 21          | 24          | 64          | 60                 | 124                 |             |
| actual on pairs                      | 905        | 867               | 972         | 937                 | 1019        | 1016        | 2896        | 2820               | 5716                |             |
| retrieved after 12 days              | 98         | 154 (245)*        | 206         | 344 (414)*          | 118         | 116         | 422         | 614 (775)*         | 1036 (1197)*        |             |
| died during rearing                  | 25         | 52 (65)*          | 85          | 113 (124)*          | 39          | 37          | 149         | 202 (226)*         | 351 (375)*          |             |
| pupated (not parasitized)            | 71         | 97 (175)*         | 96          | 205 (258)*          | 67          | 69          | 234         | 371 (502)*         | 605 (636)*          |             |
| parasitized                          | 2          | 5 (5)*            | 25          | 26 (32)*            | 12          | 10          | 39          | 41 (47)*           | 80 (86)*            |             |
| <b>Parasitism rate in %</b>          | <b>2.7</b> | <b>4.9 (2.8)*</b> | <b>20.7</b> | <b>11.3 (11.0)*</b> | <b>15.2</b> | <b>12.7</b> | <b>14.3</b> | <b>10.0 (8.6)*</b> | <b>11.7 (11.9)*</b> |             |

\*In two blocks one plant pair contained extra larvae due to a hatched egg batch from natural occurring *T. jacobaeae*. In parentheses the number of plant pairs and of larvae, respectively, including the hatched egg batch from natural occurring *T. jacobaeae*

**Table S1. Parasitism rates and infestation of plants in the field. Related to STAR Methods.** The table summarizes the number of native and invasive pairs of *J. vulgaris* plants and the number of *T. jacobaeae* larvae placed in the three blocks in the dunes of Meijndel (near The Hague) in The Netherlands.

| Origin                       | Country               | Location                               | Moths     | Parasitoids | Longitude | Latitude |
|------------------------------|-----------------------|----------------------------------------|-----------|-------------|-----------|----------|
| Invasive                     | Australia             | Beech Forest, Victoria                 |           | +           | 143°33' E | 38°38' S |
|                              |                       | Dairy Plains, Tasmania                 | +         | +           | 146°31' E | 41°38' S |
|                              |                       | Franklin 1, Tasmania,                  | +         | +           | 146°59' E | 43°05' S |
|                              |                       | Franklin 2, Tasmania,                  | +         |             | 146°59' E | 43°05' S |
|                              |                       | Mole Creek, Tasmania                   | +         | +           | 146°24' E | 41°33' S |
|                              | New Zealand           | Targa, Tasmania                        | +         | +           | 147°23' E | 41°18' S |
|                              |                       | Burkes Pass, Canterbury                |           | +           | 170°36' E | 44°04' S |
|                              |                       | Matapouri                              | +         | +           | 174°30' E | 35°33' S |
|                              |                       | West dome, South island                | +         | +           | 168°12' E | 45°35' S |
|                              |                       | Whananaki S Rd (lower valley)          |           | +           | 174°24' E | 35°33' S |
|                              |                       | Whananaki S Rd (upper valley)          | +         | +           | 174°26' E | 35°32' S |
|                              |                       | Whangarei, Pukeatua Rd 1               | +         | +           | 174°12' E | 35°47' S |
|                              |                       | Whangarei, Pukeatua Rd 2               |           | +           | 174°12' E | 35°46' S |
|                              |                       | Whangarei, Whangarei Heads Rd          | +         | +           | 174°26' E | 35°46' S |
|                              | Western North America | Cambell River, Vancouver Island        | +         | +           | 125°16' W | 50°01' N |
|                              |                       | Gabriola Island, Marvin road           | +         | +           | 123°42' W | 49°09' N |
|                              |                       | Gabriola Island, Westgyle road         | +         | +           | 123°42' W | 49°09' N |
|                              |                       | Kelowna, Chute Lake Rd                 | +         | +           | 119°31' W | 49°31' N |
|                              |                       | Kootenai National Forest, Montana      |           | +           | 114°53' W | 48°17' N |
|                              |                       | Nanaimo, Vancouver Island              | +         | +           | 123°56' W | 49°09' N |
|                              |                       | Orick 1, McDonald Creek Rd, California | +         |             | 124°05' W | 41°12' N |
|                              |                       | Orick 2, McDonald Creek Rd, California |           | +           | 124°03' W | 41°17' N |
|                              |                       | Orick 3, California                    | +         | +           | 124°03' W | 41°17' N |
|                              |                       | Orick 4, California                    |           | +           | 124°03' W | 41°17' N |
|                              |                       | Port McNeill, Vancouver Island         | +         | +           | 127°05' W | 50°35' N |
| Victoria 1, Vancouver Island |                       | +                                      | 123°21' W | 48°25' N    |           |          |
| Victoria 2, Vancouver Island | +                     | +                                      | 123°21' W | 48°25' N    |           |          |
| Native                       | Belgium               | Bertogne                               | +         | +           | 05°40' E  | 50°05' N |
|                              | Finland               | Inkoo, Kirkkonummi                     |           | +           | 24°00' E  | 60°02' N |
|                              | France                | Brilliac Bretagne                      | +         | +           | 02°48' W  | 47°32' N |
|                              |                       | Les Essarts                            | +         | +           | 01°10' W  | 46°07' N |
|                              |                       | Le Sparre Medoc                        | +         | +           | 00°54' W  | 45°17' N |
|                              |                       | Lourdes                                | +         | +           | 00°13' W  | 43°09' N |
|                              |                       | Merpuis                                |           | +           | 05°26' W  | 46°07' N |
|                              |                       | Pontorson Bretagne                     |           | +           | 01°36' W  | 48°33' N |
|                              | Germany               | Nassenheide                            |           | +           | 13°13' E  | 52°49' N |
|                              |                       | Niederwörresbach                       | +         | +           | 07°20' E  | 49°46' N |
|                              |                       | Pfingstberg                            | +         | +           | 13°52' E  | 53°08' N |
|                              | Ireland               | Dublin                                 | +         | +           | 06°15' W  | 53°20' N |
|                              | Netherlands           | Bilthoven                              | +         | +           | 05°12' E  | 52°08' N |
|                              |                       | Den Helder                             | +         | +           | 04°45' E  | 52°57' N |
|                              |                       | Lelystad                               | +         | +           | 05°27' E  | 52°29' N |
|                              |                       | Meijndel                               | +         |             | 04°20' E  | 52°07' N |
|                              |                       | Overveen                               |           | +           | 04°35' E  | 52°22' N |
|                              |                       | Veluwe                                 |           | +           | 05°49' E  | 52°14' N |
|                              |                       | Wageningen                             | +         | +           | 05°34' E  | 52°10' N |
|                              | Poland                | Pulawy                                 |           | +           | 21°59' E  | 51°24' N |
|                              | Sweden                | Sit Olofsholm, Gotland                 | +         | +           | 18°54' E  | 57°43' N |
|                              | UK                    | Corston                                | +         |             | 02°26' W  | 51°23' N |
|                              |                       | Marshgreen                             | +         | +           | 03°21' W  | 50°44' N |
|                              |                       | Silwood park, Berks London             | +         | +           | 00°38' W  | 51°24' N |
|                              |                       | Sinderhope                             | +         | +           | 02°14' W  | 54°01' N |
| Warcop                       |                       |                                        | +         | 02°32' W    | 54°32' N  |          |
|                              | Wytham                |                                        | +         | 01°18' W    | 51°46' N  |          |

**Table S2. Origin of the seeds of *Jacobaea vulgaris* used in the moth olfactometer and oviposition bioassays and the parasitoid olfactometer bioassays, respectively. Related to Figure 1, 2 and 4. Seeds from 18 native and 18 invasive populations were used in the moth assays, whereas seeds from 25 native and 25 invasive populations were used in the parasitoid olfactometer assay.**

| Origin   | Country               | Location                         | Longitude               | Latitude  | Number of plants |    |
|----------|-----------------------|----------------------------------|-------------------------|-----------|------------------|----|
| Invasive | Australia             | Franklin                         | 146°59' E               | 43°05' S  | 13               |    |
|          |                       | Mole Creek                       | 146°24' E               | 41°33' S  | 14               |    |
|          | New Zealand           | Canterbury                       | 170°36' E               | 44°04' S  | 5                |    |
|          |                       | Otahuhu                          | 174°50' E               | 36°56' S  | 5                |    |
|          |                       | Otatara                          | 168°17' E               | 46°25' S  | 6                |    |
|          |                       | West Dome                        | 168°12' E               | 45°35' S  | 12               |    |
|          |                       | Whangarei                        | 174°12' E               | 35°47' S  | 2                |    |
|          |                       | Western North America            | Chute, British Columbia | 119°36' W | 49°29' N         | 5  |
|          | Western North America | Campbell river, British Columbia | 125°16' W               | 50°01' N  | 2                |    |
|          |                       | Gabriola Island, Marvin road     | 123°42' W               | 49°09' N  | 13               |    |
|          |                       | Gabriola Island, Westgyle road   | 123°42' W               | 49°09' N  | 10               |    |
|          |                       | Nanaimo, British Columbia        | 123°56' W               | 49°9' N   | 14               |    |
|          |                       | Orick 1                          | 124°03' W               | 41°17' N  | 7                |    |
|          |                       | Orick 2                          | 124°03' W               | 41°17' N  | 13               |    |
|          |                       | Port McNeill, British Columbia   | 127°05' W               | 50°35' N  | 10               |    |
|          |                       | Victoria                         | 123°21' W               | 48°25' N  | 13               |    |
| Native   |                       | Belgium                          | Filly                   | 05°41' E  | 50°08' N         | 8  |
|          |                       |                                  | Leut                    | 05°44' E  | 50°59' N         | 12 |
|          | France                | Jublains                         | 00°29' E                | 48°15' N  | 7                |    |
|          |                       | Lac de Lecy                      | 06°26' E                | 45°59' N  | 5                |    |
|          |                       | La Rochette                      | 02°39' E                | 48°30' N  | 3                |    |
|          |                       | Santenay                         | 04°41' E                | 46°54' N  | 11               |    |
|          |                       | Vavrette                         | 05°17' E                | 46°07' N  | 10               |    |
|          |                       | Villey St Etienne                | 05°58' E                | 48°43' N  | 10               |    |
|          | Germany               | Idar Oberstein                   | 07°18' E                | 49°42' N  | 3                |    |
|          | Ireland               | Dublin                           | 06°15' W                | 53°20' N  | 0                |    |
|          | Netherlands           | Den Helder                       | 04°45' E                | 52°57' N  | 10               |    |
|          |                       | Zwanenwater                      | 05°27' E                | 52°29' N  | 10               |    |
|          |                       | Bilthoven                        | 05°12' E                | 52°08' N  | 8                |    |
|          |                       | Koningshof                       | 04°35' E                | 52°22' N  | 9                |    |
|          |                       | Meijdendel                       | 04°20' E                | 52°07' N  | 12               |    |
|          | Poland                | Mielenko                         | 16°00' E                | 54°14' N  | 13               |    |
|          | Switzerland           | St Imier                         | 06°59' E                | 47°09' N  | 5                |    |
|          |                       | Neuchâtel                        | 07°01' E                | 47°01' N  | 11               |    |
|          | UK                    | Wytham                           | 01°18' W                | 51°46' N  | 1                |    |

**Table S3. Origin of the seeds used for the field experiment. Related to STAR Methods.** We used seeds of 19 native and 16 invasive populations of *J. vulgaris* genotypes.



| class      | NIST ID                                    | retention time (RT) | identification |
|------------|--------------------------------------------|---------------------|----------------|
| aromatics  | benzaldehyde                               | 9.25                | MS and RT      |
|            | unknown aromatic                           | 26.56               | MS             |
| FAD GLVs   | ( <i>E</i> )-2-hexenal                     | 6.78                | MS and RT      |
|            | ( <i>Z</i> )-3-hexen-1-ol                  | 6.84                | MS and RT      |
|            | ( <i>Z</i> )-2-hexen-1-ol                  | 7.11                | MS and RT      |
|            | ( <i>Z</i> )-3-hexenyl acetate             | 10.28               | MS and RT      |
| FAD other  | 4-methyl-octane                            | 6.95                | MS             |
|            | 1-nonene                                   | 7.61                | MS and RT      |
|            | ( <i>E</i> )-2-decenal,                    | 10.73               | MS             |
|            | 5-methyl-undecane                          | 11.32               | MS             |
|            | 4,7-dimethyl-undecane                      | 12.29               | MS             |
|            | nonanal                                    | 12.35               | MS and RT      |
|            | decanal                                    | 14.66               | MS and RT      |
|            | 1-pentadecene                              | 21.43               | MS and RT      |
| terpenoids | trans-ocimene                              | 11.14               | MS and RT      |
|            | ( <i>E</i> )-4,8-dimethyl-1,3,7-nonatriene | 12.59               | MS and RT      |
|            | $\beta$ -copaene                           | 19.16               | MS             |
|            | $\beta$ -caryophyllene                     | 19.85               | MS and RT      |
|            | $\beta$ -bergamotene                       | 20.07               | MS and RT      |
|            | unknown terpene 1                          | 20.19               | MS             |
|            | ( <i>E</i> )- $\beta$ -farnesene           | 20.63               | MS and RT      |
|            | (+)-Epi-bicyclosesquiphellandrene          | 20.88               | MS             |
|            | germacrene D                               | 21.30               | MS             |
|            | unknown terpene 2                          | 21.53               | MS             |
|            | bicyclogermacrene                          | 21.67               | MS             |
|            | $\alpha$ -farnesene                        | 21.84               | MS             |
|            | $\beta$ -cadinene                          | 22.26               | MS             |
|            | $\alpha$ -muurolene                        | 22.60               | MS             |
|            | unknown terpene 3                          | 25.93               | MS             |
|            | unknown terpene 4                          | 29.02               | MS             |
|            | farnesol                                   | 23.47               | MS             |

**Table S4. List of the 31 quantified volatile compounds, assigned to four chemical classes, aromatics, fatty acid derived (FAD) green leaf volatiles (GLV) and other compounds as well as terpenoids. Related to Figure 3.** The identification of the compounds was either tentative and based only on the mass spectra (MS) or in addition proven by the injection of pure standards (MS and RT).
